# Supplementary material
Source: ML conference proceedings conference paper supplement (https://proceedings.mlr.press/v37/asteris15.html)
Supplement: Supplementary file [file asteris15-supp.pdf]

## 7. Proof of Lemma 2.2 – Local Packing Set

Towards the proof of Lemma 2.2, we develop a modified version of the Varshamov-Gilbert Lemma adapted to our specific model: the set of characteristic vectors of the  $S$ - $T$  paths of a  $(p, k, d)$ -layer graph  $G$ .

Let  $\delta_H(\mathbf{x}, \mathbf{y})$  denote the Hamming distance between two points  $\mathbf{x}, \mathbf{y} \in \{0, 1\}^p$ :

$$\delta_H(\mathbf{x}, \mathbf{y}) \triangleq |\{i : x_i \neq y_i\}|.$$

**Lemma 7.4.** *Consider a  $(p, k, d)$ -layer graph  $G$  on  $p$  vertices and the collection  $\mathcal{P}(G)$  of  $S$ - $T$  paths in  $G$ . Let*

$$\Omega \triangleq \{\mathbf{x} \in \{0, 1\}^p : \text{supp}(\mathbf{x}) \in \mathcal{P}(G)\},$$

*i.e., the set of characteristic vectors of all  $S$ - $T$  paths in  $G$ . For every  $\xi \in (0, 1)$ , there exists a set,  $\Omega_\xi \subset \Omega$  such that*

$$\delta_H(\mathbf{x}, \mathbf{y}) > 2(1 - \xi) \cdot k, \quad \forall \mathbf{x}, \mathbf{y} \in \Omega_\xi, \mathbf{x} \neq \mathbf{y}, \quad (29)$$

and

$$\log |\Omega_\xi| \geq \log \frac{p-2}{k} + (\xi \cdot k - 1) \cdot \log d - k \cdot H(\xi), \quad (30)$$

where  $H(\cdot)$  is the binary entropy function.

*Proof.* Consider a labeling  $1, \dots, p$  of the  $p$  vertices in  $G$ , such that variable  $\omega_i$  is associated with vertex  $i$ . Each point  $\omega \in \Omega$  is the characteristic vector of a set in  $\mathcal{P}(G)$ ; nonzero entries of  $\omega$  correspond to vertices along an  $S$ - $T$  path in  $G$ . With a slight abuse of notation, we refer to  $\omega$  as a path in  $G$ . Due to the structure of the  $(p, k, d)$ -layer graph  $G$ , all points in  $\Omega$  have exactly  $k + 2$  nonzero entries, *i.e.*,

$$\delta_H(\omega, \mathbf{0}) = k + 2, \quad \forall \omega \in \Omega.$$

Each vertex in  $\omega$  lies in a distinct layer of  $G$ . In turn, for any pair of points  $\omega, \omega' \in \Omega$ ,

$$\delta_H(\omega, \omega') = 2 \cdot (k - |\{i : \omega_i = \omega'_i = 1\}| - 2). \quad (31)$$

Note that the Hamming distance between the two points is a linear function of the number of their common nonzero entries, while it can take only even values with a maximum value of  $2k$ .

Without loss of generality, let  $S$  and  $T$  corresponding to vertices 1 and  $p$ , respectively. Then, the above imply that

$$\omega_1 = \omega_p = 1, \quad \forall \omega \in \Omega.$$

Consider a fixed point  $\hat{\omega} \in \Omega$ , and let  $\mathcal{B}(\hat{\omega}, r)$  denote the Hamming ball of radius  $r$  centered at  $\hat{\omega}$ , *i.e.*,

$$\mathcal{B}(\hat{\omega}, r) \triangleq \{\omega \in \{0, 1\}^p : \delta_H(\hat{\omega}, \omega) \leq r\}.$$

The intersection  $\mathcal{B}(\hat{\omega}, r) \cap \Omega$  corresponds to  $S$ - $T$  paths in  $G$  that have at least  $k - r/2$  additional vertices in common with  $\hat{\omega}$  besides vertices 1 and  $p$  that are common to all paths in  $\Omega$ :

$$\begin{aligned} \mathcal{B}(\hat{\omega}, r) \cap \Omega &= \{\omega \in \Omega : \delta_H(\hat{\omega}, \omega) \leq r\} \\ &= \{\omega \in \Omega : |\{i : \hat{\omega}_i = \omega_i = 1\}| \geq k - \frac{r}{2} + 2\}, \end{aligned}$$

where the last equality is due to (31). In fact, due to the structure of  $G$ , the set  $\mathcal{B}(\hat{\omega}, r) \cap \Omega$  corresponds to the  $S$ - $T$  paths that *meet*  $\hat{\omega}$  in at least  $k - r/2$  intermediate layers. Taking into account that  $|\Gamma_{\text{in}}(v)| = |\Gamma_{\text{out}}(v)| = d$ , for all vertices  $v$  in  $V(G)$  (except those in the first and last layer),

$$|\mathcal{B}(\hat{\omega}, r) \cap \Omega| \leq \binom{k}{k - \frac{r}{2}} \cdot d^{k - (k - \frac{r}{2})} = \binom{k}{k - \frac{r}{2}} \cdot d^{\frac{r}{2}}.$$

Now, consider a *maximal* set  $\Omega_\xi \subset \Omega$  satisfying (29), *i.e.*, a set that cannot be augmented by any other point in  $\Omega$ . The union of balls  $\mathcal{B}(\omega, 2(1 - \xi) \cdot (k - 1))$  over all  $\omega \in \Omega_\xi$  covers  $\Omega$ . To verify that, note that if there exists  $\omega' \in \Omega \setminus \Omega_\xi$  such that  $\delta_H(\omega, \omega') > 2(1 - \xi) \cdot (k - 1)$ ,  $\forall \omega \in \Omega_\xi$ , then  $\Omega_\xi \cup \{\omega'\}$  satisfies (29) contradicting the maximality of  $\Omega_\xi$ . Based on the above,

$$\begin{aligned} |\Omega| &\leq \sum_{\omega \in \Omega_\xi} |\mathcal{B}(\omega, 2(1 - \xi) \cdot k) \cap \Omega| \\ &\leq \sum_{\omega \in \Omega_\xi} \binom{k}{k - (1 - \xi)k} \cdot d^{(1 - \xi) \cdot k} \\ &\leq \sum_{\omega \in \Omega_\xi} \binom{k}{\xi k} \cdot d^{(1 - \xi) \cdot k} \\ &\leq |\Omega_\xi| \cdot 2^{k \cdot H(\xi)} \cdot d^{(1 - \xi) \cdot k}. \end{aligned}$$

Taking into account that

$$|\Omega| = |\mathcal{P}(G)| = \frac{p-2}{k} \cdot d^{k-1},$$

we conclude that

$$\frac{p-2}{k} \cdot d^{k-1} \leq |\Omega_\xi| \cdot 2^{k \cdot H(\xi)} \cdot d^{(1 - \xi) \cdot k},$$

from which the desired result follows.  $\square$

**Lemma 2.2.** (Local Packing) *Consider a  $(p, k, d)$ -layer graph  $G$  on  $p$  vertices with  $k \geq 4$  and  $\log d \geq 4 \cdot H(3/4)$ . For any  $\epsilon \in (0, 1]$ , there exists a set  $\mathcal{X}_\epsilon \subset \mathcal{X}(G)$  such that*

$$\epsilon/\sqrt{2} < \|\mathbf{x}_i - \mathbf{x}_j\|_2 \leq \sqrt{2} \cdot \epsilon,$$

for all  $\mathbf{x}_i, \mathbf{x}_j \in \mathcal{X}_\epsilon$ ,  $\mathbf{x}_i \neq \mathbf{x}_j$ , and

$$\log |\mathcal{X}_\epsilon| \geq \log \frac{p-2}{k} + \frac{1}{4} \cdot k \log d.$$

*Proof.* Without loss of generality, consider a labeling  $1, \dots, p$  of the  $p$  vertices in  $G$ , such that  $S$  and  $T$  correspond to vertices 1 and  $p$ , respectively. Let

$$\Omega \triangleq \{\mathbf{x} \in \{0, 1\}^p : \text{supp}(\mathbf{x}) \in \mathcal{P}(G)\},$$

where  $\mathcal{P}(G)$  is the collection of  $S$ - $T$  paths in  $G$ . By Lemma 7.4, and for  $\xi = 3/4$ , there exists a set  $\Omega_\xi \subseteq \Omega$  such that

$$\delta_H(\boldsymbol{\omega}_i, \boldsymbol{\omega}_j) > \frac{1}{2} \cdot k, \quad (32)$$

$\forall \boldsymbol{\omega}_i, \boldsymbol{\omega}_j \in \Omega_\xi, \boldsymbol{\omega}_i \neq \boldsymbol{\omega}_j$ , and,

$$\begin{aligned} \log |\Omega_\xi| &\geq \log \frac{p-2}{k} + \left(\frac{3}{4} \cdot k - 1\right) \log d - k \cdot H\left(\frac{3}{4}\right) \\ &\geq \log \frac{p-2}{k} + \frac{2}{4} \cdot k \cdot \log d - k \cdot H\left(\frac{3}{4}\right) \\ &\geq \log \frac{p-2}{k} + \frac{1}{4} \cdot k \cdot \log d \end{aligned} \quad (33)$$

where the second and third inequalities hold under the assumptions of the lemma;  $k \geq 4$  and  $\log d \geq 4 \cdot H(3/4)$ .

Consider the bijective mapping  $\psi : \Omega_\xi \rightarrow \mathbb{R}^p$  defined as

$$\psi(\boldsymbol{\omega}) = \left[ \sqrt{\frac{(1-\epsilon^2)}{2}} \cdot \omega_1, \frac{\epsilon}{\sqrt{k}} \cdot \boldsymbol{\omega}_{2:p-1}, \sqrt{\frac{(1-\epsilon^2)}{2}} \cdot \omega_p \right].$$

We show that the set

$$\mathcal{X}_\epsilon \triangleq \{\psi(\boldsymbol{\omega}) : \boldsymbol{\omega} \in \Omega_\xi\}.$$

has the desired properties. First, to verify that  $\mathcal{X}_\epsilon$  is a subset of  $\mathcal{X}(G)$ , note that  $\forall \boldsymbol{\omega} \in \Omega_\xi \subset \Omega$ ,

$$\text{supp}(\psi(\boldsymbol{\omega})) = \text{supp}(\boldsymbol{\omega}) \in \mathcal{P}(G), \quad (34)$$

and

$$\|\psi(\boldsymbol{\omega})\|_2^2 = 2 \cdot \frac{(1-\epsilon^2)}{2} + \frac{\epsilon^2}{k} \cdot \sum_{i=2}^{p-1} \omega_i = 1.$$

Second, for all pairs of points  $\mathbf{x}_i, \mathbf{x}_j \in \mathcal{X}_\epsilon$ ,

$$\|\mathbf{x}_i - \mathbf{x}_j\|_2^2 = \delta_H(\boldsymbol{\omega}_i, \boldsymbol{\omega}_j) \cdot \frac{\epsilon^2}{k} \leq 2 \cdot k \cdot \frac{\epsilon^2}{k} = 2 \cdot \epsilon^2.$$

The inequality follows from the fact that  $\delta_H(\boldsymbol{\omega}, \mathbf{0}) = k + 2$ ,  $\omega_1 = 1$  and  $\omega_p = 1, \forall \boldsymbol{\omega} \in \Omega_\xi$ , and in turn

$$\delta_H(\boldsymbol{\omega}_i, \boldsymbol{\omega}_j) \leq 2 \cdot k.$$

Similarly, for all pairs  $\mathbf{x}_i, \mathbf{x}_j \in \mathcal{X}_\epsilon, \mathbf{x}_i \neq \mathbf{x}_j$ ,

$$\|\mathbf{x}_i - \mathbf{x}_j\|_2 = \delta_H(\boldsymbol{\omega}_i, \boldsymbol{\omega}_j) \cdot \frac{\epsilon^2}{k} \geq \frac{1}{2} \cdot k \cdot \frac{\epsilon^2}{k} = \frac{\epsilon^2}{2},$$

where the inequality is due to (32). Finally, the lower bound on the cardinality of  $\mathcal{X}_\epsilon$  follows immediately from (33) and the fact that  $|\mathcal{X}_\epsilon| = |\Omega_\xi|$ , which completes the proof.  $\square$

## 8. Details in proof of Lemma 1

We want to show that if

$$\epsilon^2 = \min \left\{ 1, \frac{C' \cdot (1 + \beta)}{\beta^2} \cdot \frac{\log \frac{p-2}{k} + \frac{k}{4} \cdot \log d}{n} \right\},$$

for an appropriate choice of  $C' > 0$ , then the following two conditions (Eq. (13)) are satisfied:

$$n \cdot \frac{2\epsilon^2\beta^2}{(1+\beta)} \frac{1}{\log |\mathcal{X}_\epsilon|} \leq \frac{1}{4} \quad \text{and} \quad \log |\mathcal{X}_\epsilon| \geq 4 \log 2.$$

For the second inequality, recall that by Lemma 2.2,

$$\log |\mathcal{X}_\epsilon| \geq \log \frac{p-2}{k} + \frac{1}{4} \cdot k \log d > 0. \quad (35)$$

Under the assumptions of Thm. 1 on the parameters  $k$  and  $d$  (note that  $p-2 \geq k \cdot d$  by the structure of  $G$ ),

$$\log |\mathcal{X}_\epsilon| \geq \log \frac{p-2}{k} + \frac{k}{4} \cdot \log d \geq 4 \cdot H(3/4) \geq 4 \log 2,$$

which is the desired result.

For the first inequality, we consider two cases:

- First, we consider the case where  $\epsilon^2 = 1$ , i.e.,

$$\epsilon^2 = 1 \leq \frac{C' \cdot (1 + \beta)}{\beta^2} \cdot \frac{\log \frac{p-2}{k} + \frac{k}{4} \cdot \log d}{n}.$$

Equivalently,

$$n \cdot \frac{2\epsilon^2\beta^2}{(1+\beta)} \leq 2 \cdot C' \cdot \left( \log \frac{p-2}{k} + \frac{k}{4} \cdot \log d \right). \quad (36)$$

- In the second case,

$$\epsilon^2 = \frac{C' \cdot (1 + \beta)}{\beta^2} \cdot \frac{\log \frac{p-2}{k} + \frac{k}{4} \cdot \log d}{n},$$

which implies that

$$n \cdot \frac{2\epsilon^2\beta^2}{(1+\beta)} = 2 \cdot C' \cdot \left( \log \frac{p-2}{k} + \frac{k}{4} \cdot \log d \right). \quad (37)$$

Combining (36) or (37), with (35), we obtain

$$n \cdot \frac{2\epsilon^2\beta^2}{(1+\beta)} \frac{1}{\log |\mathcal{X}_\epsilon|} \leq 2 \cdot C' \leq \frac{1}{4}$$

for  $C' \leq 1/8$ .

We conclude that for  $\epsilon$  chosen as in (12), the conditions in (13) hold.

## 9. Other

and

**Assumption 1.** *There exist i.i.d. random vectors  $\mathbf{z}_1, \dots, \mathbf{z}_n \in \mathbb{R}^p$ , such that  $\mathbb{E}\mathbf{z}_i = \mathbf{0}$  and  $\mathbb{E}\mathbf{z}_i\mathbf{z}_i^\top = \mathbb{I}_p$ ,*

$$\sup_{\mathbf{x} \in \mathbb{S}_2^{p-1}} \|\mathbf{z}_i^\top \mathbf{x}\|_{\psi_2} \leq K, \quad (39)$$

where  $\mu \in \mathbb{R}^p$  and  $K > 0$  is a constant depending on the distribution of  $\mathbf{z}_i$ s.

$$\mathbf{y} = \mu + \Sigma^{1/2} \mathbf{z}_i \quad (38)$$
